# Supplementary material
Source: PubMed Central journal article supplement (PMC6329979)
Supplement: pnas.1812186116.sapp.pdf [file pnas.1812186116.sapp.pdf]

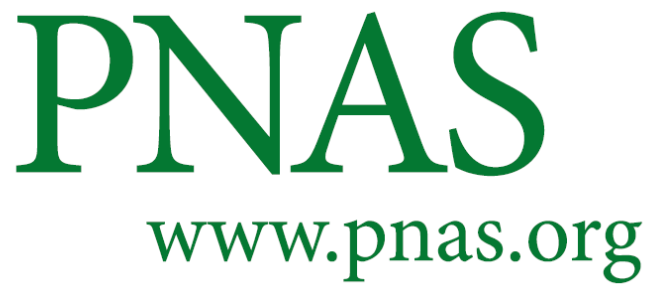

## Supplementary Information for

### **Differential control of human Treg and effector T cells in tumor immunity by Fc-engineered anti-CTLA-4 antibody**

Danbee Ha, Atsushi Tanaka, Tatsuya Kibayashi, Atsushi Tanemura, Daisuke Sugiyama, James Badger Wing, Ee Lyn Lim, Karen Wei Weng Teng, Dennis Adeegbe, Evan W. Newell, Ichiro Katayama, Hiroyoshi Nishikawa, and Shimon Sakaguchi

Correspondence: Shimon Sakaguchi, M.D., Ph.D.  
E-mail: [shimon@ifrec.osaka-u.ac.jp](mailto:shimon@ifrec.osaka-u.ac.jp)

#### **This PDF file includes:**

Figs. S1 to S6

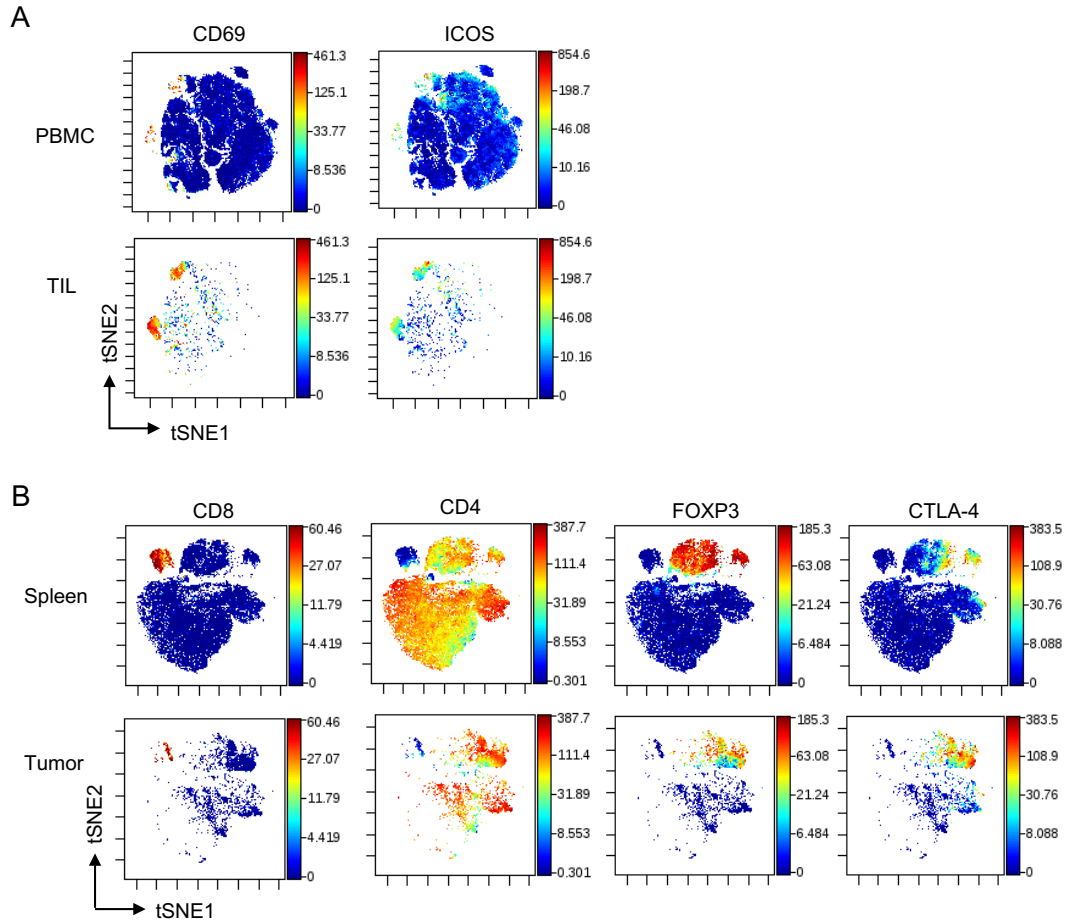

**Fig. S1. CTLA-4 expression by Treg and CD8<sup>+</sup> T cells.**

(A) PBMCs and TILs from human melanoma patients by CyTOF analysis as in Fig. 1E. viSNE plots of CD4<sup>+</sup> and CD8<sup>+</sup> T cells with heat maps for indicated marker expression levels are shown (n=2). (B) CyTOF analysis of CTLA-4 expressing clusters in spleen and tumor from CMS5a fibrosarcoma-bearing BALB/c mice (n=2). viSNE plots of selected markers on CD4<sup>+</sup> and CD8<sup>+</sup> T cells are shown.

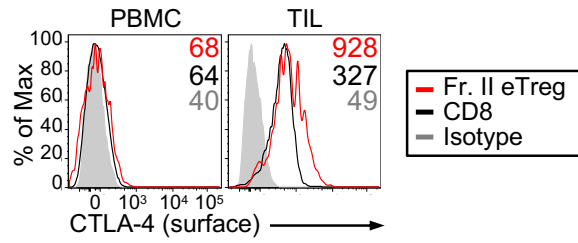

**Fig. S2. CTLA-4 expression by Treg and CD8<sup>+</sup> T cells in humans.** Representative histogram for the surface CTLA-4 staining of tumor-infiltrating (n=11) and circulating (n=14) human Fr. II eTreg and CD8<sup>+</sup> T cells from melanoma patients.

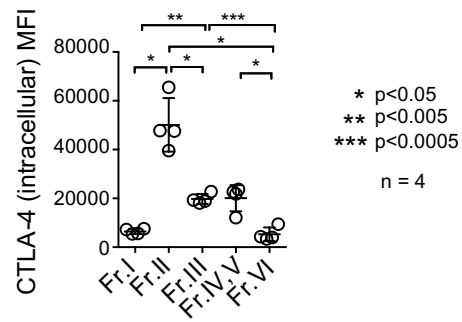

**Fig. S3. CTLA-4 expression by Treg and CD4<sup>+</sup> T cell fractions upon Melan-A stimulation.** CTLA-4 expression by CD4<sup>+</sup> fractions of PBMCs after 9 days of Melan-A stimulation alone, as in Fig. 2D (n=4).

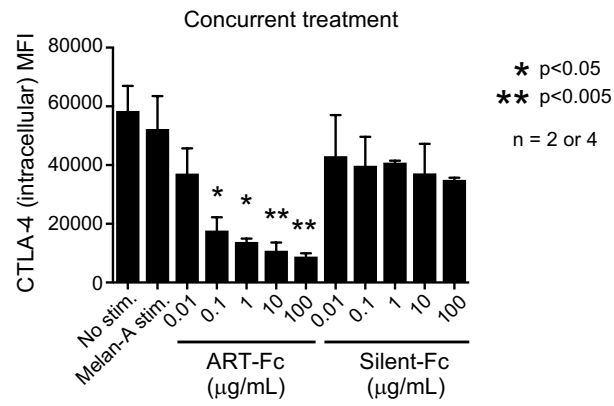

**Fig. S4. CTLA-4 expression by eTreg cells treated with cell-depleting or non-depleting anti-CTLA-4 mAb in vitro.** CTLA-4 expression levels of Fr. II eTreg cells treated with ART-Fc or silent-Fc anti-CTLA-4 mAb at indicated concentrations from day 0 concurrently with Melan-A stimulation in vitro (n=2 or 4). \* $P \leq 0.05$ , \*\* $P \leq 0.005$  by unpaired *t* tests against Melan-A stimulation alone.

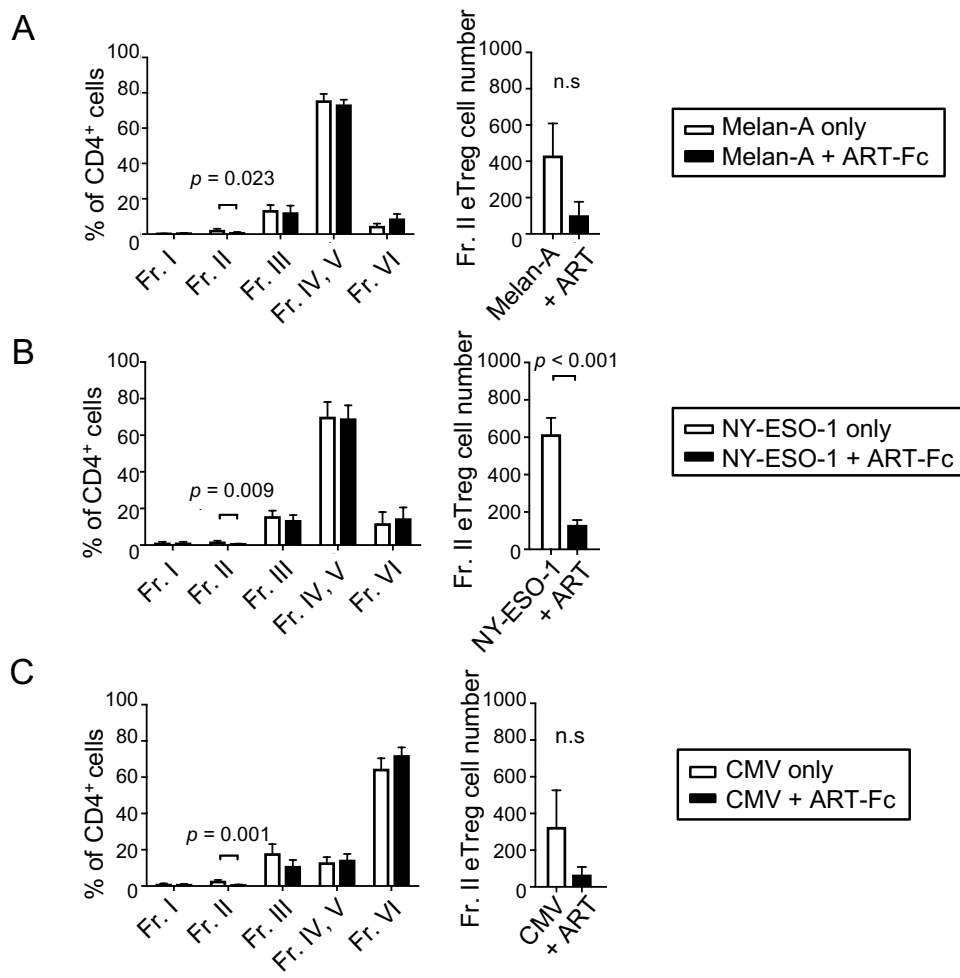

**Fig. S5. Changes in other CD4<sup>+</sup> T cell fractions with concurrent ART-Fc anti-CTLA-4 mAb treatment.** (A to C) The percentage of CD4<sup>+</sup> fractions (left) and the cell number of Fr. II eTreg cells (right) of PBMCs after 9 days of various antigen stimulation in the absence or the presence of ART-Fc, related to Figure 2G and H. Means ± SEM.

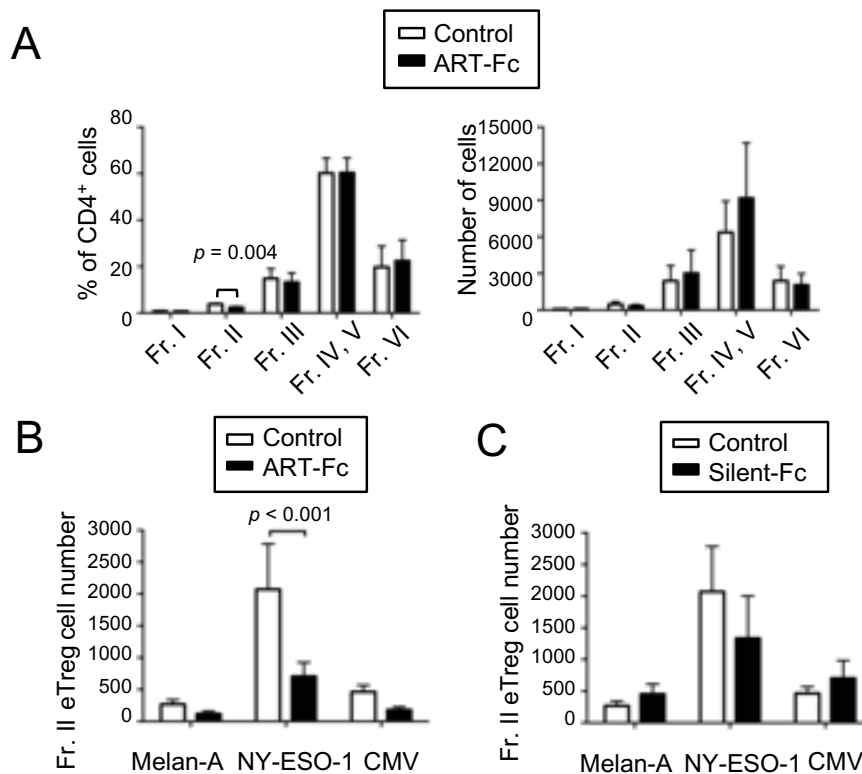

**Fig. S6. Changes in other CD4<sup>+</sup> T cell fractions and cell number of Fr. II eTreg cells.**  
**(A)** The percentage and absolute number of each CD4<sup>+</sup> fraction after 5 days of ART-Fc treatment without antigen stimulation as in Figure 3A. **(B and C)** Changes in cell number of Fr. II eTreg cells after 8 days of various antigen stimulation, as shown in Figure 3B and D. PBMCs were pre-treated for 5 days with ART-Fc **(B)** or Silent-Fc **(C)**. Means  $\pm$  SEM. Depicted significances between two groups were calculated using t test for **(A)**, and Two-way ANOVA with Sidak's multiple comparison test for **(B)** and **(C)**.
